# Supplementary material for: Palbociclib Promotes Dephosphorylation of NPM/B23 at Threonine 199 and Inhibits Endometrial Cancer Cell Growth
Source: PubMed Central journal article supplement (PMC6678831; doi:10.3390/cancers11071025), 2019-07-20
Supplement: cancers-11-01025-s001.pdf [file cancers-11-01025-s001.pdf]

# Supplementary Materials: Palbociclib Promotes Dephosphorylation of NPM/B23 at Threonine 199 and Inhibits Endometrial Cancer Cell Growth

Chiao-Yun Lin, Li-Yu Lee, Tzu-Hao Wang, Cheng-Lung Hsu, Chia-Lung Tsai, Angel Chao and Chyong-Huey Lai

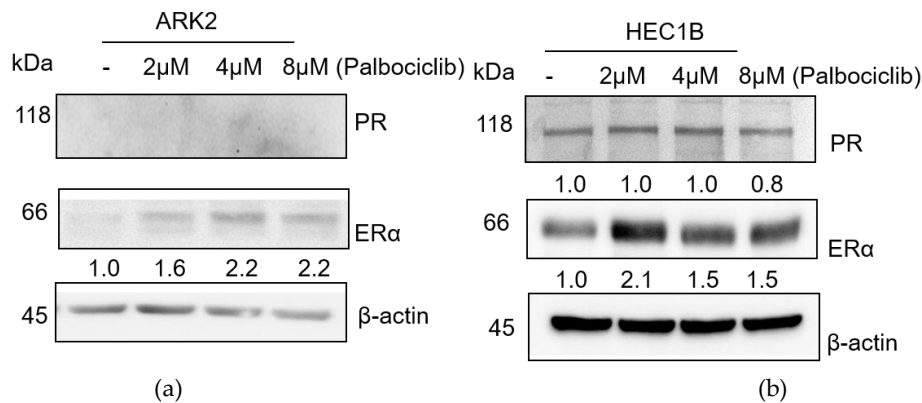

**Figure S1.** PR expression did not affect by palbociclib treatment. (a,b) ARK2 (left panel) and HEC1B cells (right panel) were treated with vehicle (-) or different doses of Palbociclib (2, 4, 8 μM) for 24 h. Cell lysates were subsequently resolved on SDS-PAGE and subjected to immunoblotting with antibodies raised against PR, ERα and β-actin. Densitometry-derived values (bottom) are normalized with the control that was set as 1. Data shown are derived from three independent experiments. β-actin serves as the loading control for normalization.

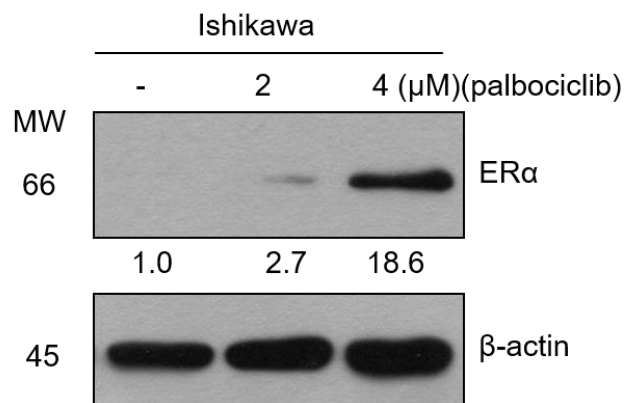

**Figure S2.** Palbociclib induces ERα expression in late-passage ( $n > 40$ ) Ishikawa endometrial cancer cells. Ishikawa were treated with vehicle (-) or different doses of Palbociclib (2, 4 μM) for 24 h. Cell lysates were subsequently resolved on SDS-PAGE and subjected to immunoblotting with antibodies raised against ERα and β-actin. Densitometry-derived values (bottom) are normalized with the control that was set as 1. Data shown are derived from three independent experiments. β-actin serves as the loading control for normalization.

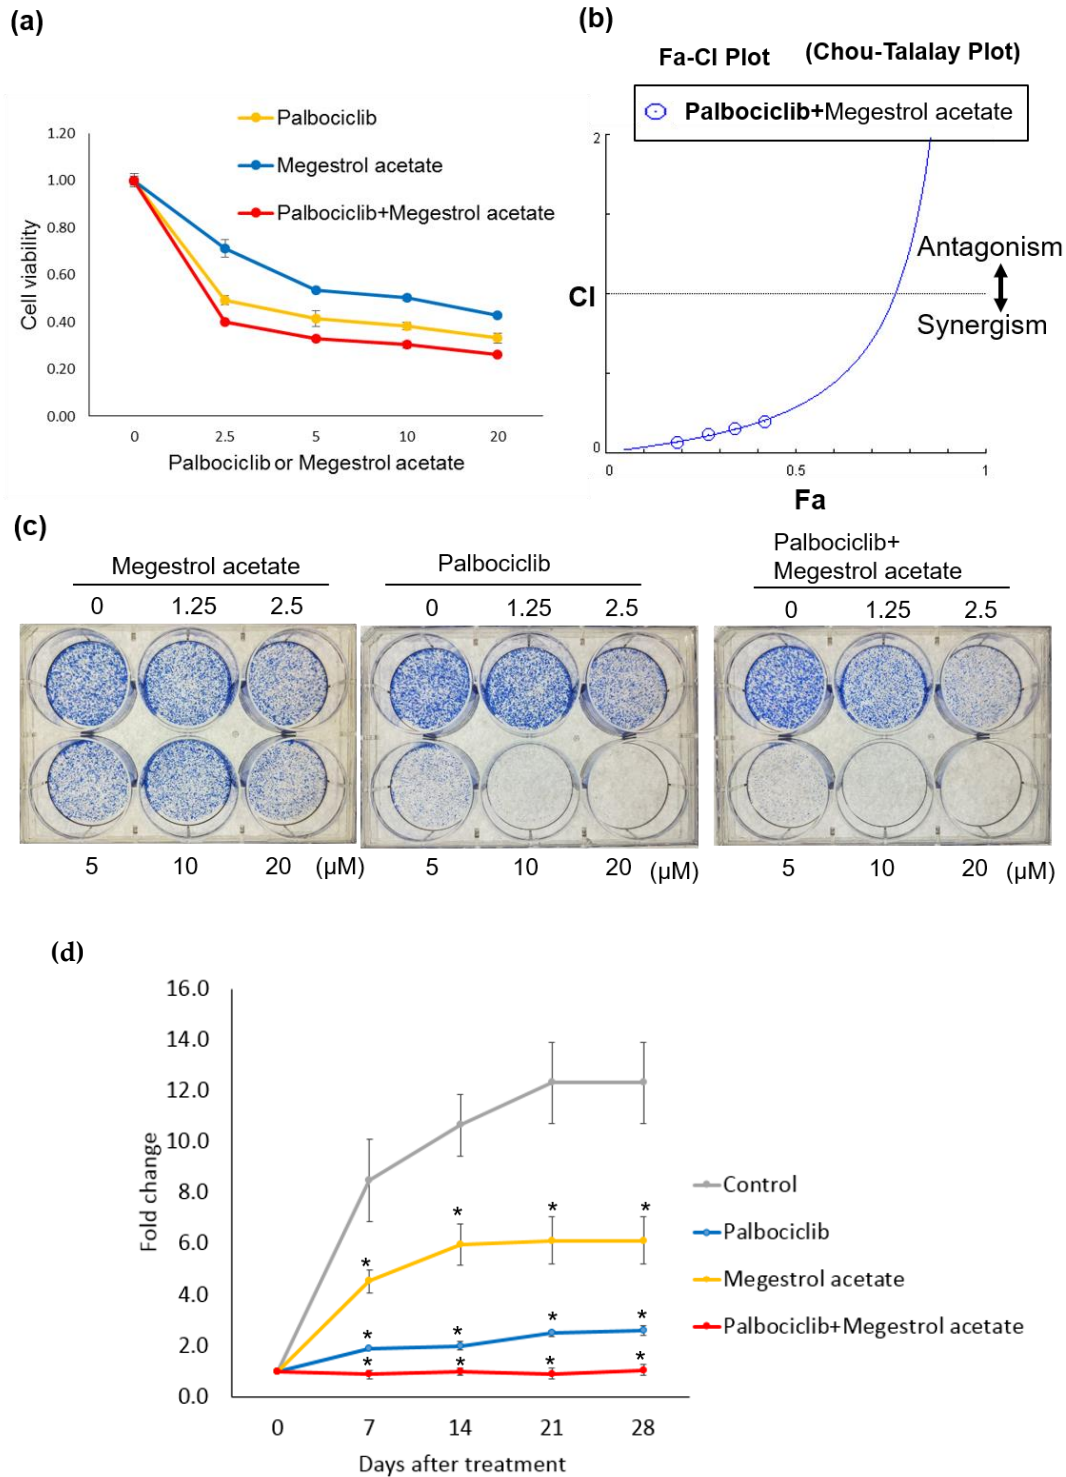

**Figure S3.** The combination of palbociclib and megestrol acetate exerts antitumor effects in endometrial cancer cells and in a xenograft tumor model. **(a)** HEC1B cells were treated with vehicle (-) or different doses of palbociclib alone (0, 2.5, 5, 10, and 20  $\mu\text{M}$ ), megestrol acetate alone (0, 2.5, 5, 10, and 20  $\mu\text{M}$ ), or their combination for 72 h. Cell survival was analyzed with the MTT assay. All experiments were performed in triplicate and data are expressed as fold change  $\pm$  SD relative to vehicle-treated cells (left panel). **(b)** The synergistic effect of palbociclib and megestrol acetate was analyzed using the CompuSyn software (right panel). **(c)** HEC1B cells were treated with vehicle (-) or different doses of palbociclib alone (0, 1.25, 2.5, 5, 10, and 20  $\mu\text{M}$ ), megestrol acetate alone (0, 1.25, 2.5, 5, 10, and 20  $\mu\text{M}$ ), or their combination (palbociclib plus megestrol acetate) for 5 days. The clonogenic assay was used to assess colony formation. **(d)** Inhibitory effects of the palbociclib/megestrol acetate combination on cancer growth in a xenograft tumor model. \*  $p < 0.05$  versus control.

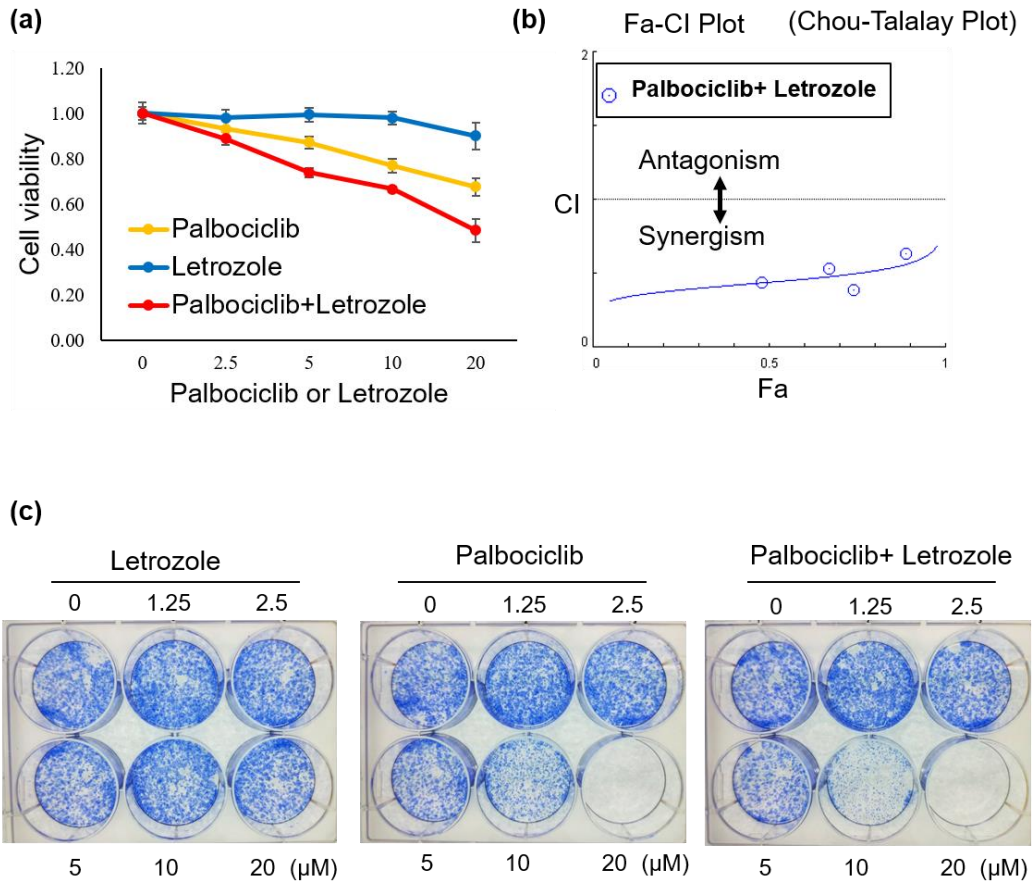

**Figure S4.** The combination of palbociclib and letrozole exerts synergistic antitumor effects in endometrial cancer cells. **(a)** ARK2 cells were treated with vehicle (-) or different doses of palbociclib alone (0, 2.5, 5, 10 and 20  $\mu$ M), letrozole alone (0, 2.5, 5, 10, and 20  $\mu$ M), or their combination for 72 h. Cell survival was analyzed with the MTT assay. All experiments were performed in triplicate and data are expressed as fold change  $\pm$  SD relative to vehicle-treated cells (left panel). **(b)** The synergistic effect of palbociclib and letrozole was analyzed using the CompuSyn software (right panel). **(c)** ARK2 cells were treated with vehicle (-) or different doses of palbociclib alone (0, 1.25, 2.5, 5, 10, and 20  $\mu$ M), letrozole alone (0, 1.25, 2.5, 5, 10, and 20  $\mu$ M), or their combination (palbociclib plus letrozole) for 5 days. The clonogenic assay was used to assess colony formation.

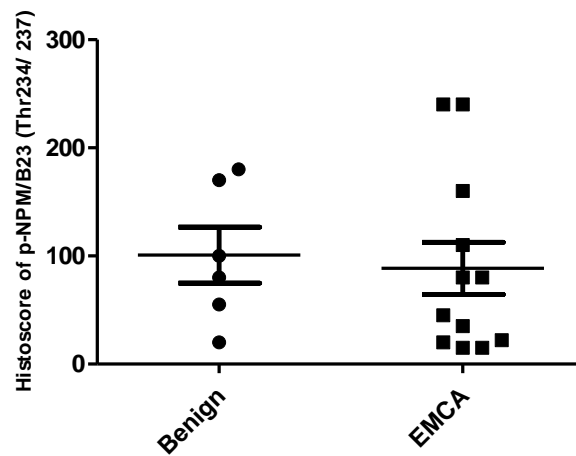

**Figure S5.** Immunohistochemical expression of phospho-NPM/B23 (Thr234/237) in normal endometrium and endometrial cancer. Immunohistochemistry was used to calculate histoscores of phospho-NPM/B23 (Thr199) expression in endometrial tissue obtained from patients who underwent hysterectomy for benign gynecologic conditions ( $n = 6$ ) and endometrial cancer ( $n = 12$ ).

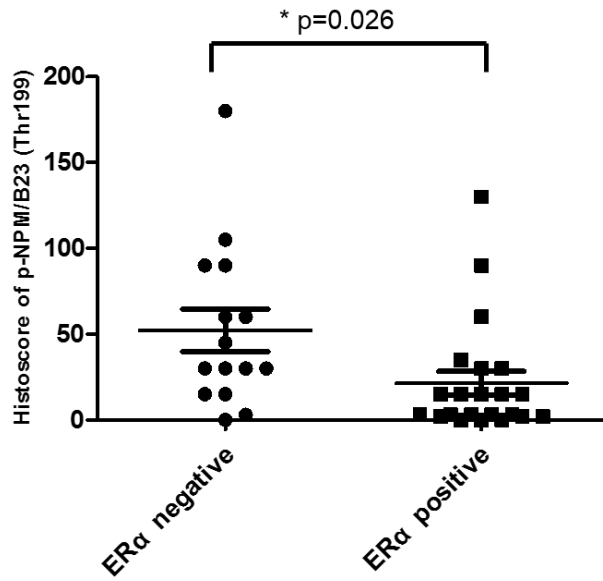

**Figure S6.** Immunohistochemical expression of phospho-NPM/B23 (Thr199) in endometrial cancer. Histoscores of phospho-NPM/B23 (Thr199) expression in ERα negative ( $n = 15$ ) and ERα positive ( $n = 22$ ) patients with endometrial cancer.

Table S1. Clinical information of patients with endometrial cancer

| Number | Age | Type                                |
|--------|-----|-------------------------------------|
| 1      | 52  | endometrioid adenocarcinoma         |
| 2      | 58  | adenosquamous carcinoma             |
| 3      | 51  | endometrioid adenocarcinoma         |
| 4      | 54  | endometrioid adenocarcinoma         |
| 5      | 49  | endometrioid adenocarcinoma         |
| 6      | 56  | adenosquamous carcinoma             |
| 7      | 72  | endometrioid adenocarcinoma         |
| 8      | 61  | endometrioid adenocarcinoma         |
| 9      | 46  | endometrioid adenocarcinoma         |
| 10     | 44  | endometrioid adenocarcinoma         |
| 11     | 53  | endometrioid adenocarcinoma         |
| 12     | 59  | endometrioid adenocarcinoma         |
| 13     | 76  | clear cell adenocarcinoma           |
| 14     | 94  | clear cell adenocarcinoma           |
| 15     | 67  | serous papillary cystadenocarcinoma |
| 16     | 53  | clear cell adenocarcinoma           |
| 17     | 62  | serous papillary cystadenocarcinoma |
| 18     | 50  | serous papillary cystadenocarcinoma |
| 19     | 78  | clear cell adenocarcinoma           |
| 20     | 62  | serous papillary cystadenocarcinoma |
| 21     | 65  | serous cystadenocarcinoma           |
| 22     | 56  | serous adenocarcinoma               |
| 23     | 84  | serous adenocarcinoma               |

|    |    |                           |
|----|----|---------------------------|
| 24 | 43 | clear cell adenocarcinoma |
| 25 | 59 | serous adenocarcinoma     |
| 26 | 72 | serous adenocarcinoma     |
| 27 | 72 | serous adenocarcinoma     |
| 28 | 65 | clear cell adenocarcinoma |
| 29 | 62 | serous adenocarcinoma     |
| 30 | 46 | clear cell adenocarcinoma |
| 31 | 56 | clear cell adenocarcinoma |
| 32 | 70 | serous adenocarcinoma     |
| 33 | 68 | clear cell adenocarcinoma |
| 34 | 64 | serous adenocarcinoma     |
| 35 | 79 | serous adenocarcinoma     |
| 36 | 76 | clear cell adenocarcinoma |
| 37 | 73 | clear cell adenocarcinoma |

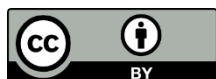

© 2019 by the authors. Licensee MDPI, Basel, Switzerland. This article is an open access article distributed under the terms and conditions of the Creative Commons Attribution (CC BY) license (<http://creativecommons.org/licenses/by/4.0/>).
